# Supplementary material
Source: publisher site journal article supplement (https://www.spandidos-publications.com/2863/downloadSupplementary)

Figure S1. Original flow cytometry data of the cell cycle analysis. Representative results of the cell cycle analysis in SUMO1P3-knockdown cells.

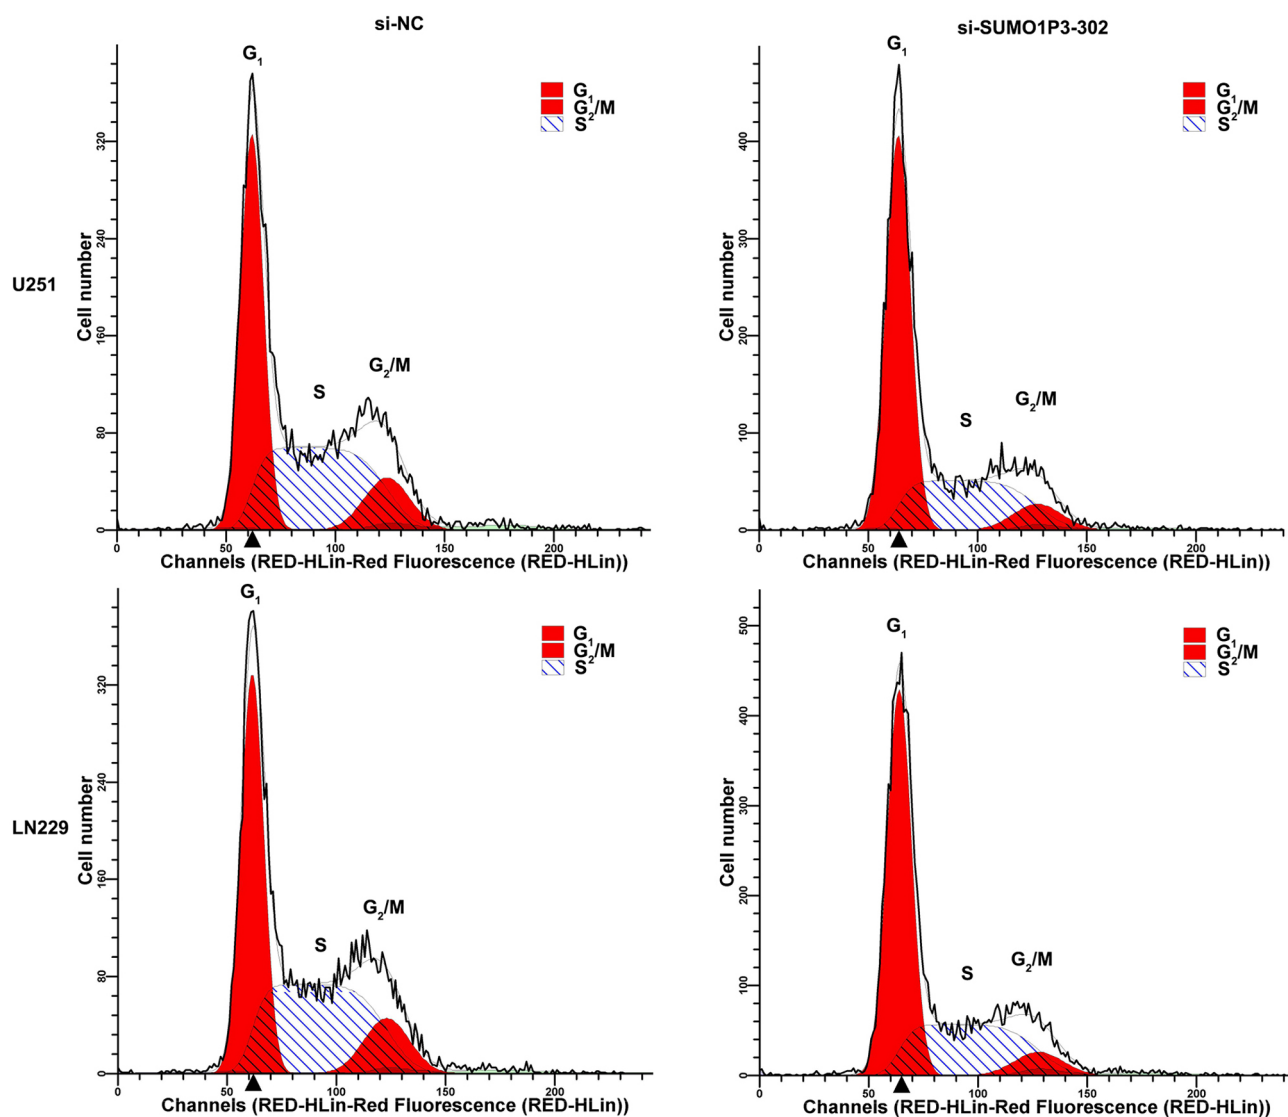

Supplement: Supplementary file 1 [file downloadSupplementary]
